# Supplementary material
Source: PubMed Central journal article supplement (PMC5064863)
Supplement: NIHMS810703-supplement-1.pdf [file NIHMS810703-supplement-1.pdf]

**Supplemental Table S1**  
**Individual Alligator Information**

| Site          | JUV/ADU<br>LT | Sex            | Capture<br>Date | Captain      | Time of<br>Capture | Total<br>length<br>(cm) | SVL<br>(cm) | Tail Girth<br>(cm) | GPS (Lat)  | GPS<br>(Long) |  |
|---------------|---------------|----------------|-----------------|--------------|--------------------|-------------------------|-------------|--------------------|------------|---------------|--|
| AP            | ADULT         | M              | 3/31/10         | Patrick      | 14.16              | 264                     | 138         | 73                 | N 28.65189 | W 81.68704    |  |
| AP            | ADULT         | M              | 3/31/10         | Russ/Ditch   | 21.02              | 289.5                   | 146         | 67.5               | N 28.65412 | W 81.69017    |  |
| AP            | ADULT         | M              | 4/9/10          | Cameron      | 14.30              | 316                     | 153         | 78                 | N 28.32701 | W 80.36643    |  |
| AP            | ADULT         | M              | 3/31/10         | Cameron      | 13.06              | 288                     | 154         | 77.5               | N 28.67602 | W 81.66834    |  |
| AP            | ADULT         | M              | 4/9/10          | Cameron      | 16.20              | 334                     | 162         | 73                 | N 28.40751 | W 81.39685    |  |
| AP            | ADULT         | M              | 3/31/10         | Cameron      | 20.31              | 322.1                   | 168.6       | 74.1               | N 28.40720 | W 81.39499    |  |
| AP            | ADULT         | M              | 3/31/10         | Patrick/Russ | 10.45              | 328                     | 169         | 80.5               |            |               |  |
| AP            | ADULT         | M              | 4/9/10          | Cameron      | 13.20              | 370                     | 184         | 91                 | N 28.63409 | W 81.69177    |  |
| AP            | ADULT         | M              | 3/31/10         | Patrick/Russ | 11.13              | 384                     | 196         | 97                 |            |               |  |
| AP            | ADULT         | M              | 4/9/10          | Cameron      | 11.37              | 370                     |             |                    | N 28.64828 | W 81.68927    |  |
| <b>TOTALS</b> |               | <b>10males</b> |                 |              |                    |                         |             |                    |            |               |  |
|               |               |                |                 |              |                    |                         | 163.4       |                    |            |               |  |

| Site          | JUV/ADU<br>LT | Sex             | Capture<br>Date | Captain     | Time of<br>Capture | Total<br>length<br>(cm) | SVL<br>(cm) | Tail Girth<br>(cm) | GPS (Lat)  | GPS<br>(Long) |  |
|---------------|---------------|-----------------|-----------------|-------------|--------------------|-------------------------|-------------|--------------------|------------|---------------|--|
| MI            | ADULT         | M               | 4/7/10          | Patrick     | 15.00              | 256                     | 124         | 56.5               | N 28.50637 | W 80.64509    |  |
| MI            | ADULT         | M               | 4/7/10          | Carly/Ditch | 16.40              | 261                     | 127         | 60                 | N 28.30856 | W 80.40598    |  |
| MI            | ADULT         | M               | 4/7/10          | Patrick     | 13.25              | 260                     | 129         | 60.5               | N 28.50685 | W 80.64771    |  |
| MI            | ADULT         | M               | 4/7/10          | Cameron     | 15.07              | 257                     | 137         | 62                 | N 28.57147 | W 80.67096    |  |
| MI            | ADULT         | M               | 4/7/10          | Russ/Ditch  | 17.45              | 277                     | 137         | 60.5               | N 28.59442 | W 80.66725    |  |
| MI            | ADULT         | M               | 4/7/10          | Russ/Ditch  | 17.10              | 282                     | 140         | 63                 | N 28.59442 | W 80.66725    |  |
| MI            | ADULT         | M               | 4/7/10          | Patrick     | 11.20              | 301                     | 140         | 74                 | N 28.44339 | W 80.60034    |  |
| MI            | ADULT         | M               | 4/7/10          | Russ/Ditch  | 14.35              | 293                     | 147         | 68                 | N 28.64338 | W 80.70582    |  |
| MI            | ADULT         | M               | 4/7/10          | Russ/Ditch  | 13.06              | 298                     | 149         | 67.5               | N 28.59442 | W 80.66725    |  |
| MI            | ADULT         | M               | 4/7/10          | Russ/Ditch  | 10.20              | 301                     | 154         | 63                 | N 28.52425 | W 80.63851    |  |
| <b>TOTALS</b> |               | <b>10 males</b> |                 |             |                    |                         |             |                    |            |               |  |
|               |               |                 |                 |             |                    |                         | 138.4       |                    |            |               |  |

| Site          | JUV/ADU<br>LT | Sex             | Capture<br>Date | Captain      | Time of<br>Capture | Total<br>length<br>(cm) | SVL<br>(cm) | Tail Girth<br>(cm) | GPS (Lat)  | GPS<br>(Long) |  |
|---------------|---------------|-----------------|-----------------|--------------|--------------------|-------------------------|-------------|--------------------|------------|---------------|--|
| WO            | ADULT         | M               | 4/5/10          | Patrick/Russ | 14.30              | 223                     | 118         | 50                 | N 29.09156 | W 81.40450    |  |
| WO            | ADULT         | M               | 4/5/10          | Cameron      | 14.00              | 252                     | 134.5       | 59.3               | N 29.10733 | W 81.40573    |  |
| WO            | ADULT         | M               | 4/5/10          | Patrick/Russ | 17.17              | 290                     | 140         | 63                 | N 29.09274 | W 81.40385    |  |
| WO            | ADULT         | M               | 4/5/10          | Patrick/Russ | 17.45              | 288                     | 146         | 65                 | N 29.08722 | W 81.40537    |  |
| WO            | ADULT         | M               | 4/5/10          | Patrick/Russ | 10.40              | 285                     | 149         | 69                 | N 29.09426 | W 81.40544    |  |
| WO            | ADULT         | M               | 4/5/10          | Arnold       | 11.00              | 325                     | 156         | 78                 | N 29.07784 | W 81.23633    |  |
| WO            | ADULT         | M               | 4/5/10          | Patrick/Russ | 12.35              | 302.6                   | 157.3       | 66                 | N 29.08005 | W 81.41041    |  |
| WO            | ADULT         | M               | 4/5/10          | Patrick/Russ | 15.35              | 286                     | 165         | 63.5               | N 29.13348 | W 81.39153    |  |
| WO            | ADULT         | M               | 4/5/10          | Patrick/Russ | 11.20              | 336                     | 171         | 69                 | N 29.08833 | W 81.40450    |  |
| WO            | ADULT         | M               | 4/5/10          | Arnold/Lou   | 12.15              | 330                     | 176.5       | 72.5               | N 29.07906 | W 81.23619    |  |
| WO            | ADULT         | M               | 4/5/10          | Patrick/Russ | 13.25              | 325                     | 181         | 78                 | N 29.10739 | W 81.40569    |  |
| <b>TOTALS</b> |               | <b>11 males</b> |                 |              |                    |                         |             |                    |            |               |  |
|               |               |                 |                 |              |                    |                         | 154.027     |                    |            |               |  |

The site (WO, AP, MI), age, sex, capture date, boat captain, time capture, total length (cm), snout-vent-length (SVL) (cm), tail girth (cm), and GPS information are listed for each alligator samples in the study.

**Supplemental Table S2**  
**Comparison: AP vs. WO DMR Gene Association**

| DMR Name                 | Chromosome | cSTART  | cSTOP   | Adj Oligo | Size (bp) | Description (Gene Association)                                                                                                                | Identity | Accession      |
|--------------------------|------------|---------|---------|-----------|-----------|-----------------------------------------------------------------------------------------------------------------------------------------------|----------|----------------|
| JH731055:404115-405575   | JH731055   | 404115  | 405575  | 3         | 1461      | Fasciola hepatica genome assembly Fhepatica_v1_scaffold scaffold1834_old                                                                      | 83%      | LM665074.1     |
| JH731125:503613-505040   | JH731125   | 503613  | 505040  | 3         | 1428      | Paralichthys olivaceus clone scaffold225_717 microsatellite sequence                                                                          | 90%      | JN900812.1     |
| JH731207:340484-341908   | JH731207   | 340484  | 341908  | 3         | 1425      | PREDICTED: Alligator mississippiensis gamma-1-syntrophin-like (LOC102569753), partial mRNA                                                    | 96%      | XM 006258375.1 |
| JH731240:1092466-1093975 | JH731240   | 1092466 | 1093975 | 3         | 1510      | Chrysemys picta BAC clone CHY3-62H12 from chromosome unknown, complete sequence                                                               | 77%      | AC239227.3     |
| JH731301:1071733-1073193 | JH731301   | 1071733 | 1073193 | 3         | 1461      | Alligator sinensis immunoglobulin heavy chain region genomic sequence                                                                         | 73%      | JQ479335.1     |
| JH731459:10190-11675     | JH731459   | 10190   | 11675   | 3         | 1486      | Alligator sinensis immunoglobulin heavy chain region genomic sequence                                                                         | 78%      | JQ479335.1     |
| JH731488:74648-76133     | JH731488   | 74648   | 76133   | 3         | 1486      | Chrysemys picta BAC clone CHY3-79H12 from chromosome unknown, complete sequence                                                               | 87%      | AC239597.1     |
| JH731559:216471-217886   | JH731559   | 216471  | 217886  | 3         | 1416      | Schistocephalus solidus genome assembly S_solidus_NST_G2_scaffold SSLN_scaffold0002589                                                        | 89%      | LL902805.1     |
| JH731805:276012-277476   | JH731805   | 276012  | 277476  | 3         | 1465      | Diphyllbothrium latum genome assembly D_latum_Geneva_scaffold DILT_contig0000309                                                              | 100%     | LL586140.1     |
| JH731811:1340018-1341493 | JH731811   | 1340018 | 1341493 | 3         | 1476      | Mus musculus chromosome 14, clone RP23-477H13, complete sequence                                                                              | 84%      | AC131330.25    |
| JH731812:1496-2945       | JH731812   | 1496    | 2945    | 3         | 1450      | PREDICTED: Pantholops hodgsonii lectin, mannose-binding, 1 (LMAN1), mRNA                                                                      | 86%      | XM 005972817.1 |
| JH731855:107787-109207   | JH731855   | 107787  | 109207  | 3         | 1421      | PREDICTED: Alligator sinensis uncharacterized LOC102375006 (LOC102375006), misc_RNA                                                           | 85%      | XR 324857.1    |
| JH731932:12968-14649     | JH731932   | 12968   | 14649   | 3         | 1682      | Alligator sinensis immunoglobulin heavy chain region genomic sequence                                                                         | 77%      | JQ479335.1     |
| JH731934:498361-500203   | JH731934   | 498361  | 500203  | 4         | 1843      | PREDICTED: Alligator mississippiensis syntaxin 17 (STX17), transcript variant X2, mRNA                                                        | 100%     | XM 006260382.1 |
| JH732060:1153065-1154559 | JH732060   | 1153065 | 1154559 | 3         | 1495      | PREDICTED: Alligator mississippiensis arginyl aminopeptidase (aminopeptidase B)-like 1 (RNPEPL1), mRNA                                        | 100%     | XM 006260799.1 |
| JH732175:382785-384210   | JH732175   | 382785  | 384210  | 3         | 1426      | PREDICTED: Alligator sinensis uncharacterized LOC102386692 (LOC102386692), misc_RNA                                                           | 73%      | XR 324702.1    |
| JH732195:209594-211065   | JH732195   | 209594  | 211065  | 3         | 1472      | PREDICTED: Chaetura pelagica testis-expressed sequence 2 protein-like (LOC104386233), mRNA                                                    | 83%      | XM 009994809.1 |
| JH732266:385607-387064   | JH732266   | 385607  | 387064  | 3         | 1458      | PREDICTED: Alligator mississippiensis septipaterin reductase (7,8-dihydrobiopterin:NADP+ oxidoreductase) (SPR), mRNA                          | 100%     | XM 006361301.1 |
| JH732368:10678-12333     | JH732368   | 10678   | 12333   | 3         | 1656      | Chrysemys picta BAC clone CHY3-81H12 from chromosome unknown, complete sequence                                                               | 84%      | AC238955.2     |
| JH732571:351468-352952   | JH732571   | 351468  | 352952  | 3         | 1485      | PREDICTED: Alligator mississippiensis IQ motif containing K (IQCK), transcript variant X1, mRNA                                               | 91%      | XM 006259008.1 |
| JH732676:110685-112148   | JH732676   | 110685  | 112148  | 3         | 1464      | PREDICTED: Alligator sinensis nucleotide-binding oligomerization domain-containing protein 2-like (LOC102387914), transcript variant X1, mRNA | 86%      | XM 006039339.1 |
| JH733127:362718-364150   | JH733127   | 362718  | 364150  | 3         | 1433      | Acanthochelys spixii retrotransposon CR1-like LINE, complete sequence                                                                         | 76%      | AB005891.1     |
| JH733217:9673-11094      | JH733217   | 9673    | 11094   | 3         | 1422      | Alligator mississippiensis Chompy miniature inverted-repeat transposable element, partial sequence                                            | 89%      | DQ063338.1     |
| JH733220:229306-230762   | JH733220   | 229306  | 230762  | 3         | 1457      | PREDICTED: Alligator mississippiensis inositol-triphosphate 3-kinase A (ITPKA), partial mRNA                                                  | 72%      | XM 006265889.1 |
| JH733230:73100-74516     | JH733230   | 73100   | 74516   | 3         | 1417      | PREDICTED: Alligator mississippiensis myosin-9-like (LOC102574832), partial mRNA                                                              | 92%      | XM 006266873.1 |
| JH733567:93466-95217     | JH733567   | 93466   | 95217   | 4         | 1752      | Alligator sinensis immunoglobulin heavy chain region genomic sequence                                                                         | 67%      | JQ479335.1     |
| JH733604:95353-96821     | JH733604   | 95353   | 96821   | 3         | 1469      | Alligator sinensis immunoglobulin heavy chain region genomic sequence                                                                         | 74%      | JQ479335.1     |
| JH733615:196486-198178   | JH733615   | 196486  | 198178  | 3         | 1693      | PREDICTED: Alligator sinensis transmembrane protein 65 (TMEM65), mRNA                                                                         | 72%      | XM 006028471.1 |
| JH733615:1517983-1519448 | JH733615   | 1517983 | 1519448 | 3         | 1466      | PREDICTED: Alligator sinensis uncharacterized LOC102367788 (LOC102367788), transcript variant X2, misc_RNA                                    | 98%      | XR 324451.1    |
| JH733641:142951-144851   | JH733641   | 142951  | 144851  | 3         | 1901      | PREDICTED: Alligator sinensis uncharacterized LOC102380552 (LOC102380552), misc_RNA                                                           | 70%      | XR 323585.1    |
| JH733652:523979-525397   | JH733652   | 523979  | 525397  | 3         | 1419      | PREDICTED: Alligator mississippiensis putative lysosomal acid lipase/cholesteryl ester hydrolase-like (LOC102562113), mRNA                    | 81%      | XM 006272247.1 |
| JH733661:89143-90563     | JH733661   | 89143   | 90563   | 3         | 1421      | Mus musculus chromosome 5, clone RP23-6J21, complete sequence                                                                                 | 93%      | AC164410.5     |
| JH733757:841901-843385   | JH733757   | 841901  | 843385  | 3         | 1485      | PREDICTED: Pelodiscus sinensis uncharacterized LOC102461997 (LOC102461997), ncRNA                                                             | 68%      | XR 333071.1    |
| JH733767:138736-140234   | JH733767   | 138736  | 140234  | 3         | 1499      | Crocodylus porosus clone CpP1404 microsatellite sequence                                                                                      | 79%      | EU593421.1     |
| JH733861:289982-291477   | JH733861   | 289982  | 291477  | 3         | 1496      | Alligator sinensis immunoglobulin heavy chain region genomic sequence                                                                         | 80%      | JQ479335.1     |

|                          |          |         |         |   |      |                                                                                                                                                          |      |                |
|--------------------------|----------|---------|---------|---|------|----------------------------------------------------------------------------------------------------------------------------------------------------------|------|----------------|
| JH733909:44053-45749     | JH733909 | 44053   | 45749   | 3 | 1697 | PREDICTED: Alligator mississippiensis beta-1,4-N-acetyl-galactosaminyl transferase 3 (B4GALNT3), mRNA                                                    | 100% | XM 006265693.1 |
| JH734079:74271-75705     | JH734079 | 74271   | 75705   | 3 | 1435 | PREDICTED: Alligator sinensis zinc finger protein 135 like (LOC102381513), mRNA                                                                          | 71%  | XM 006036439.1 |
| JH734173:178176-179656   | JH734173 | 178176  | 179656  | 3 | 1481 | PREDICTED: Chrysemys picta bellii uncharacterized LOC101942014 (LOC101942014), ncRNA                                                                     | 69%  | XR 257523.2    |
| JH734278:397128-398560   | JH734278 | 397128  | 398560  | 3 | 1433 | PREDICTED: Chrysemys picta bellii solute carrier family 16 (monocarboxylate transporter), member 7 (SLC16A7), transcript variant X2, mRNA                | 79%  | XM 005297971.2 |
| JH734350:68009-69455     | JH734350 | 68009   | 69455   | 3 | 1447 | Meriones unguiculatus clone 24 vomeronasal type 2 receptor (V2R) gene, exon 3 and partial cds                                                            | 94%  | KJ847402.1     |
| JH734502:41351-43067     | JH734502 | 41351   | 43067   | 4 | 1717 | PREDICTED: Alligator mississippiensis uncharacterized LOC102577156 (LOC102577156), mRNA                                                                  | 88%  | XM 006266883.1 |
| JH734560:85523-86973     | JH734560 | 85523   | 86973   | 3 | 1451 | Homo sapiens chromosome X clone RP11-185O17 map p11.4, complete sequence                                                                                 | 88%  | AC092268.4     |
| JH734878:60524-62395     | JH734878 | 60524   | 62395   | 3 | 1872 | Crocodylus siamensis immunoglobulin heavy chain region genomic sequence                                                                                  | 80%  | JQ479336.1     |
| JH735001:288928-290635   | JH735001 | 288928  | 290635  | 3 | 1708 | Spirometra erinaceieuropaei genome assembly S_erinaceieuropaei_scaffold SPER_contig0200157                                                               | 90%  | LN451503.1     |
| JH735217:599910-601383   | JH735217 | 599910  | 601383  | 3 | 1474 | PREDICTED: Alligator sinensis fatty acid desaturase 1-like (LOC102382251), mRNA                                                                          | 73%  | XM 006033326.1 |
| JH735261:93202-94650     | JH735261 | 93202   | 94650   | 3 | 1449 | Alligator sinensis immunoglobulin heavy chain region genomic sequence                                                                                    | 76%  | JQ479335.1     |
| JH735392:384436-386110   | JH735392 | 384436  | 386110  | 3 | 1675 | PREDICTED: Alligator sinensis guanine nucleotide binding protein (G protein), alpha activating activity polypeptide, olfactory type (GNAL), partial mRNA | 98%  | XM 006036342.1 |
| JH735548:319490-321215   | JH735548 | 319490  | 321215  | 3 | 1726 | PREDICTED: Chrysemys picta bellii ovochymase-2-like (LOC101951603), mRNA                                                                                 | 89%  | XM 008170299.1 |
| JH735687:873877-875567   | JH735687 | 873877  | 875567  | 4 | 1691 | Crocodylus siamensis immunoglobulin heavy chain region genomic sequence                                                                                  | 82%  | JQ479336.1     |
| JH736073:60550-62051     | JH736073 | 60550   | 62051   | 3 | 1502 | Alligator sinensis immunoglobulin heavy chain region genomic sequence                                                                                    | 68%  | JQ479335.1     |
| JH736199:10319-11973     | JH736199 | 10319   | 11973   | 3 | 1655 | PREDICTED: Chrysemys picta bellii cytochrome P450 1B1 (LOC101941680), mRNA                                                                               | 72%  | XM_008174397.1 |
| JH736323:150041-151515   | JH736323 | 150041  | 151515  | 3 | 1475 | Alligator sinensis immunoglobulin heavy chain region genomic sequence                                                                                    | 74%  | JQ479335.1     |
| JH736348:186769-188241   | JH736348 | 186769  | 188241  | 3 | 1473 | Gallus gallus BAC clone CH261-138H22 from chromosome ul, complete sequence                                                                               | 66%  | AC171112.2     |
| JH736700:4289-5719       | JH736700 | 4289    | 5719    | 3 | 1431 | PREDICTED: Alligator mississippiensis solute carrier family 44 (choline transporter), member 2 (SLC44A2), transcript variant X2, mRNA                    | 74%  | XM_006265591.1 |
| JH736702:61535-62960     | JH736702 | 61535   | 62960   | 3 | 1426 | Acanthochelys spixii retrotransposon CR1-like LINE, complete sequence                                                                                    | 76%  | AB005891.1     |
| JH736705:150267-151692   | JH736705 | 150267  | 151692  | 3 | 1426 | PREDICTED: Alligator mississippiensis epidermal growth factor (EGF), mRNA                                                                                | 77%  | XM_006264080.1 |
| JH736722:1115487-1116974 | JH736722 | 1115487 | 1116974 | 3 | 1488 | Homo sapiens 12 BAC RP11-82C23 (Roswell Park Cancer Institute Human BAC Library) complete sequence                                                       | 81%  | AC009773.27    |
| JH736997:17151-18587     | JH736997 | 17151   | 18587   | 3 | 1437 | Alligator sinensis immunoglobulin heavy chain region genomic sequence                                                                                    | 82%  | JQ479335.1     |
| JH737149:861047-862468   | JH737149 | 861047  | 862468  | 3 | 1422 | Crocodylus porosus clone CpP2514 microsatellite sequence                                                                                                 | 77%  | EU593456.1     |
| JH737202:573177-574646   | JH737202 | 573177  | 574646  | 3 | 1470 | Crocodylus porosus clone CpP2514 microsatellite sequence                                                                                                 | 78%  | EU593456.1     |
| JH737273:74396-76048     | JH737273 | 74396   | 76048   | 3 | 1653 | Mus musculus chromosome 19, clone RP24-330P23, complete sequence                                                                                         | 90%  | AC157916.2     |
| JH737349:122248-123713   | JH737349 | 122248  | 123713  | 3 | 1466 | PREDICTED: Alligator sinensis magnesium transporter NIPA2-like (LOC102383552), partial mRNA                                                              | 75%  | XM_006026533.1 |
| JH737379:1151972-1153421 | JH737379 | 1151972 | 1153421 | 3 | 1450 | PREDICTED: Alligator sinensis sorbitol dehydrogenase (SORD), mRNA                                                                                        | 74%  | XM_006020303.1 |
| JH737791:115214-116644   | JH737791 | 115214  | 116644  | 3 | 1431 | PREDICTED: Alligator sinensis dynein, axonemal, heavy chain 9 (DNAH9), mRNA                                                                              | 80%  | XM_006022043.1 |
| JH737859:12207-13643     | JH737859 | 12207   | 13643   | 3 | 1437 | PREDICTED: Monodelphis domestica uncharacterized LOC103105780 (LOC103105780), ncRNA                                                                      | 81%  | XR_467700.1    |
| JH737933:204136-205566   | JH737933 | 204136  | 205566  | 3 | 1431 | PREDICTED: Alligator sinensis general transcription factor IIE subunit 2-like (LOC102385461), transcript variant X2, mRNA                                | 84%  | XM_006033990.1 |
| JH738117:135638-137115   | JH738117 | 135638  | 137115  | 3 | 1478 | Crocodylus moreletii Chompy miniature inverted-repeat transposable element, partial sequence                                                             | 77%  | DQ063478.1     |
| JH738181:785219-786651   | JH738181 | 785219  | 786651  | 3 | 1433 | PREDICTED: Alligator mississippiensis aldehyde dehydrogenase 5 family, member A1 (ALDH5A1), mRNA                                                         | 76%  | XM_006260546.1 |
| JH738262:261161-262898   | JH738262 | 261161  | 262898  | 4 | 1738 | PREDICTED: Alligator sinensis matrix metalloproteinase 23B (MMP23B), mRNA                                                                                | 87%  | XM_006016178.1 |
| JH738276:975007-976972   | JH738276 | 975007  | 976972  | 3 | 1966 | PREDICTED: Alligator mississippiensis FERM domain containing 6 (FRMD6), mRNA                                                                             | 99%  | XM_006276033.1 |

|                          |          |         |         |   |      |                                                                                                                                           |      |                |
|--------------------------|----------|---------|---------|---|------|-------------------------------------------------------------------------------------------------------------------------------------------|------|----------------|
| JH738335:681339-682811   | JH738335 | 681339  | 682811  | 3 | 1473 | PREDICTED: Alligator mississippiensis UDP-N-acetyl-alpha-D-galactosamine:polypeptide N-acetylgalactosaminyltransferase 18 (GALNT18), mRNA | 100% | XM_006276188.1 |
| JH738431:222669-224394   | JH738431 | 222669  | 224394  | 4 | 1726 | PREDICTED: Alligator sinensis class I histocompatibility antigen, F10 alpha chain-like (LOC102380209), partial mRNA                       | 77%  | XM_006034603.1 |
| JH738473:4006858-4008341 | JH738473 | 4006858 | 4008341 | 3 | 1484 | Tomistoma schlegelii GG13a marker genomic sequence                                                                                        | 82%  | KP159742.1     |
| JH738529:139176-140606   | JH738529 | 139176  | 140606  | 3 | 1431 | Crocodylus porosus clone CpP307 microsatellite sequence                                                                                   | 80%  | EU593353.1     |
| JH738577:157531-159731   | JH738577 | 157531  | 159731  | 3 | 2201 | PREDICTED: Alligator sinensis latent transforming growth factor beta binding protein 2 (LTBP2), transcript variant X4, mRNA               | 87%  | XM_006015345.1 |
| JH738813:301073-302505   | JH738813 | 301073  | 302505  | 3 | 1433 | Latimeria menadoensis clone VMRC4-39G19, complete sequence                                                                                | 70%  | AC150309.1     |
| JH738843:47603-49037     | JH738843 | 47603   | 49037   | 3 | 1435 | Chrysemys picta BAC clone CHY3-12H12 from chromosome unknown, complete sequence                                                           | 80%  | AC239503.2     |
| JH738873:51340-52825     | JH738873 | 51340   | 52825   | 3 | 1486 | Crocodylus siamensis immunoglobulin heavy chain region genomic sequence                                                                   | 77%  | JQ479336.1     |
| JH739160:115399-116863   | JH739160 | 115399  | 116863  | 3 | 1465 | PREDICTED: Alligator sinensis uncharacterized LOC102383386 (LOC102383386), misc_RNA                                                       | 80%  | XR_324864.1    |
| JH739336:305673-307823   | JH739336 | 305673  | 307823  | 3 | 2151 | PREDICTED: Alligator sinensis uncharacterized LOC102379123 (LOC102379123), mRNA                                                           | 99%  | XM_006027934.1 |
| JH739357:18949-20682     | JH739357 | 18949   | 20682   | 4 | 1734 | Crocodylus moreletii Chompy miniature inverted-repeat transposable element, partial sequence                                              | 76%  | DQ063478.1     |
| JH739357:59250-60986     | JH739357 | 59250   | 60986   | 3 | 1737 | Pan troglodytes BAC clone CH251-671111 from chromosome 7, complete sequence                                                               | 86%  | AC190158.3     |
| JH739432:152406-153874   | JH739432 | 152406  | 153874  | 3 | 1469 | Mecistops cataphractus CP13 marker genomic sequence                                                                                       | 75%  | KP159689.1     |
| JH739718:20429-21910     | JH739718 | 20429   | 21910   | 3 | 1482 | Alligator sinensis immunoglobulin heavy chain region genomic sequence                                                                     | 87%  | JQ479335.1     |
| JH739833:101919-103400   | JH739833 | 101919  | 103400  | 3 | 1482 | PREDICTED: Alligator sinensis methylmalonyl CoA epimerase (MCEE), transcript variant X2, mRNA                                             | 77%  | XM_006020025.1 |

The AP vs. WO (3+ adjacent probe) DMR associated genes are presented with DMR name, chromosome (genomic contig) location, start and stop locations of the DMR, number of adjacent oligo (Adj. Oligo) in the DMR, size in base pair (bp) of the DMR, DMR associated gene description, percent (%) identity between the gene homology and DMR sequence and gene accession identification are presented for each DMR.

**Supplemental Table S3**  
**Comparison: MI vs. WO DMR Gene Association**

| DMR Name                 | Chromosome | cSTART  | cSTOP   | Adj<br>Oligo | Size<br>(bp) | Description (Gene Association)                                                                                   | Identity | Accession      |
|--------------------------|------------|---------|---------|--------------|--------------|------------------------------------------------------------------------------------------------------------------|----------|----------------|
| JH731028:544624-546075   | JH731028   | 544624  | 546075  | 3            | 1452         | PREDICTED: Alligator mississippiensis kinesin family member 6 (KIF6), mRNA                                       | 99%      | XM_006257878.1 |
| JH731124:14052-15519     | JH731124   | 14052   | 15519   | 3            | 1468         | PREDICTED: Alligator sinensis C-type lectin domain family 2 member D-like (LOC102382038), mRNA                   | 77%      | XM_006038095.1 |
| JH731181:392010-393974   | JH731181   | 392010  | 393974  | 3            | 1965         | Crocodylus siamensis immunoglobulin heavy chain region genomic sequence                                          | 85%      | JQ479336.1     |
| JH731275:210512-211988   | JH731275   | 210512  | 211988  | 3            | 1477         | Human DNA sequence from clone RP11-323P17 on chromosome 10, complete sequence                                    | 79%      | AL391425.25    |
| JH731279:152159-153815   | JH731279   | 152159  | 153815  | 3            | 1657         | PREDICTED: Alligator mississippiensis discs, large homolog 1 (Drosophila) (DLG1), transcript variant X2, mRNA    | 100%     | XM_006258584.1 |
| JH731435:44314-46031     | JH731435   | 44314   | 46031   | 4            | 1718         | Chrysemys picta BAC clone CHY3-63H12 from chromosome unknown, complete sequence                                  | 73%      | AC239228.1     |
| JH731438:251682-253157   | JH731438   | 251682  | 253157  | 3            | 1476         | Homo sapiens 3 BAC RP11-122D23 (Roswell Park Cancer Institute Human BAC Library) complete sequence               | 74%      | AC117429.6     |
| JH731625:506614-508048   | JH731625   | 506614  | 508048  | 3            | 1435         | PREDICTED: Alligator sinensis WAS/WASL interacting protein family, member 3 (WIPF3), transcript variant X1, mRNA | 79%      | XM_006019590.1 |
| JH731907:91281-92776     | JH731907   | 91281   | 92776   | 3            | 1496         | Crocodylus novaeguineae CP13 marker genomic sequence                                                             | 85%      | KP159687.1     |
| JH731976:1036096-1037529 | JH731976   | 1036096 | 1037529 | 3            | 1434         | Crocodylus siamensis immunoglobulin heavy chain region genomic sequence                                          | 93%      | JQ479336.1     |
| JH732028:39604-41304     | JH732028   | 39604   | 41304   | 4            | 1701         | Crocodylus porosus clone CpP3215 microsatellite sequence                                                         | 83%      | EU593482.1     |
| JH732029:279546-281014   | JH732029   | 279546  | 281014  | 3            | 1469         | Crocodylus moreletii Chompy miniature inverted-repeat transposable element, partial sequence                     | 84%      | DQ063425.1     |
| JH732498:85960-87391     | JH732498   | 85960   | 87391   | 3            | 1432         | PREDICTED: Alligator sinensis inhibitor of apoptosis protein-like (LOC102368067), transcript variant X1, mRNA    | 78%      | XM_006032933.1 |
| JH732524:169154-170833   | JH732524   | 169154  | 170833  | 3            | 1680         | PREDICTED: Alligator sinensis multiple epidermal growth factor-like domains protein 6-like (LOC102371633), mRNA  | 73%      | XM_006018743.1 |
| JH732565:273016-274471   | JH732565   | 273016  | 274471  | 3            | 1456         | Homo sapiens chromosome 11, clone RP13-726E6, complete sequence                                                  | 95%      | AC127526.11    |
| JH732688:13797-15237     | JH732688   | 13797   | 15237   | 3            | 1441         | Alligator sinensis immunoglobulin heavy chain region genomic sequence                                            | 75%      | JQ479335.1     |
| JH732723:80932-82382     | JH732723   | 80932   | 82382   | 3            | 1451         | Haemonchus placei genome assembly H_placei_MHpl1, scaffold HPLM_scaffold0001869                                  | 70%      | LM584932.1     |
| JH732887:748219-749649   | JH732887   | 748219  | 749649  | 3            | 1431         | PREDICTED: Alligator sinensis uncharacterized LOC102385133 (LOC102385133), mRNA                                  | 81%      | XM_006031543.1 |
| JH732889:760906-762575   | JH732889   | 760906  | 762575  | 3            | 1670         | Alligator sinensis immunoglobulin heavy chain region genomic sequence                                            | 79%      | JQ479335.1     |
| JH732968:356659-358102   | JH732968   | 356659  | 358102  | 3            | 1444         | Homo sapiens chromosome 5 clone CTC-470C15, complete sequence                                                    | 78%      | AC008526.5     |
| JH733013:1880886-1882579 | JH733013   | 1880886 | 1882579 | 4            | 1694         | Chrysemys picta BAC clone CHY3-94H12 from chromosome unknown, complete sequence                                  | 75%      | AC239523.2     |
| JH733097:799997-801460   | JH733097   | 799997  | 801460  | 3            | 1464         | PREDICTED: Pelodiscus sinensis G-protein coupled receptor 183-like (LOC102448388), transcript variant X2, mRNA   | 74%      | XM_006115385.1 |
| JH733396:408624-410107   | JH733396   | 408624  | 410107  | 3            | 1484         | Chrysemys picta BAC clone CHY3-7H12 from chromosome unknown, complete sequence                                   | 75%      | AC239233.2     |
| JH733564:87374-88805     | JH733564   | 87374   | 88805   | 3            | 1432         | Alligator sinensis immunoglobulin heavy chain region genomic sequence                                            | 87%      | JQ479335.1     |
| JH733614:243993-245473   | JH733614   | 243993  | 245473  | 3            | 1481         | PREDICTED: Chrysemys picta bellii collagen alpha-1(III) chain-like (LOC101941259), mRNA                          | 77%      | XM_005310545.1 |
| JH733690:474234-475672   | JH733690   | 474234  | 475672  | 3            | 1439         | Cyprinus carpio genome assembly common carp genome, scaffold LG26                                                | 80%      | LN590710.1     |
| JH733740:46293-47759     | JH733740   | 46293   | 47759   | 3            | 1467         | Theobroma cacao Uncharacterized protein (TCM_004454) mRNA, complete cds                                          | 88%      | XM_007050622.1 |
| JH733745:319860-321349   | JH733745   | 319860  | 321349  | 3            | 1490         | Human DNA sequence from clone RP3-402H5 on chromosome 6p12.3-21.1, complete sequence                             | 73%      | AL161622.12    |
| JH733756:246146-247559   | JH733756   | 246146  | 247559  | 3            | 1414         | Alligator sinensis immunoglobulin heavy chain region genomic sequence                                            | 93%      | JQ479335.1     |
| JH733781:132454-133942   | JH733781   | 132454  | 133942  | 3            | 1489         | Crocodylus porosus clone CpDi24 microsatellite sequence                                                          | 81%      | EU593293.1     |
| JH733829:92861-94306     | JH733829   | 92861   | 94306   | 3            | 1446         | PREDICTED: Alligator sinensis cytochrome P450 26B1-like (LOC102388048), transcript variant X2, mRNA              | 76%      | XM_006034634.1 |
| JH734058:219651-221823   | JH734058   | 219651  | 221823  | 4            | 2173         | PREDICTED: Alligator sinensis ADP-ribosylation factor-like protein 13B-like (LOC102382571), mRNA                 | 96%      | XM_006026530.1 |
| JH734276:203600-205051   | JH734276   | 203600  | 205051  | 3            | 1452         | Alligator sinensis immunoglobulin heavy chain region genomic sequence                                            | 76%      | JQ479335.1     |
| JH734340:20176-21594     | JH734340   | 20176   | 21594   | 3            | 1419         | Chrysemys picta BAC clone CHY3-94H12 from chromosome unknown, complete sequence                                  | 77%      | AC239523.2     |
| JH734345:27580-29040     | JH734345   | 27580   | 29040   | 3            | 1461         | PREDICTED: Alligator sinensis neurturin (NRTN), mRNA                                                             | 95%      | XM_006017519.1 |
| JH734734:611286-612728   | JH734734   | 611286  | 612728  | 3            | 1443         | PREDICTED: Alligator sinensis GrpE-like 1, mitochondrial (E. coli) (GRPEL1), mRNA                                | 94%      | XM_006017017.1 |
| JH734774:27018-28738     | JH734774   | 27018   | 28738   | 3            | 1721         | Chrysemys picta BAC clone CHY3-54H12 from chromosome unknown, complete sequence                                  | 81%      | AC239516.2     |
| JH734862:464575-466323   | JH734862   | 464575  | 466323  | 3            | 1749         | Crocodylus siamensis immunoglobulin heavy chain region genomic sequence                                          | 72%      | JQ479336.1     |
| JH734864:188264-189735   | JH734864   | 188264  | 189735  | 3            | 1472         | Alligator mississippiensis ornithine carbamoyltransferase (OTC), mRNA                                            | 88%      | NM_001287307.1 |
| JH734963:125128-126576   | JH734963   | 125128  | 126576  | 3            | 1449         | PREDICTED: Alligator mississippiensis dual specificity phosphatase 3 (DUSP3), mRNA                               | 100%     | XM_006268590.1 |

|                          |          |         |         |   |      |                                                                                                                                                           |      |                |
|--------------------------|----------|---------|---------|---|------|-----------------------------------------------------------------------------------------------------------------------------------------------------------|------|----------------|
| JH735292:425047-426526   | JH735292 | 425047  | 426526  | 3 | 1480 | Alligator sinensis immunoglobulin heavy chain region genomic sequence                                                                                     | 84%  | JQ479335.1     |
| JH735370:16577-18054     | JH735370 | 16577   | 18054   | 3 | 1478 | Alligator sinensis immunoglobulin heavy chain region genomic sequence                                                                                     | 96%  | JQ479335.1     |
| JH735574:92415-93871     | JH735574 | 92415   | 93871   | 3 | 1457 | PREDICTED: Alligator sinensis coxsackie virus and adenovirus receptor (CXADR), transcript variant X3, mRNA                                                | 74%  | XM_006022916.1 |
| JH735642:264423-265853   | JH735642 | 264423  | 265853  | 3 | 1431 | PREDICTED: Alligator sinensis uncharacterized LOC102372027 (LOC102372027), transcript variant X6, misc_RNA                                                | 77%  | XR_325444.1    |
| JH735680:11080-12530     | JH735680 | 11080   | 12530   | 3 | 1451 | Crocodylus porosus clone CpP307 microsatellite sequence                                                                                                   | 83%  | EU593353.1     |
| JH735877:123705-125428   | JH735877 | 123705  | 125428  | 3 | 1724 | PREDICTED: Anolis carolinensis uncharacterized LOC103279522 (LOC103279522), mRNA                                                                          | 95%  | XM_008115102.1 |
| JH736083:224544-225970   | JH736083 | 224544  | 225970  | 3 | 1427 | PREDICTED: Alligator mississippiensis OAF homolog (Drosophila) (OAF), mRNA                                                                                | 93%  | XM_006259692.1 |
| JH736125:2278276-2279750 | JH736125 | 2278276 | 2279750 | 3 | 1475 | Crocodylus porosus clone CpP3215 microsatellite sequence                                                                                                  | 79%  | EU593482.1     |
| JH736231:200698-202417   | JH736231 | 200698  | 202417  | 3 | 1720 | Homo sapiens chromosome 18, clone RP11-786F14, complete sequence                                                                                          | 72%  | AC091021.8     |
| JH736511:1984-3446       | JH736511 | 1984    | 3446    | 3 | 1463 | Homo sapiens chromosome 10 clone RP11-423F10, complete sequence                                                                                           | 77%  | AC012047.8     |
| JH736586:1462903-1464332 | JH736586 | 1462903 | 1464332 | 3 | 1430 | PREDICTED: Alligator sinensis Smith-Magenis syndrome chromosome region, candidate 8 (SMCR8), mRNA                                                         | 97%  | XM_006024036.1 |
| JH736674:141958-143424   | JH736674 | 141958  | 143424  | 3 | 1467 | Alligator mississippiensis Sf3a2 and amAMH genes for splicing factor 3A2 and anti-mullerian hormone, partial and complete cds                             | 75%  | AB546782.1     |
| JH736687:371416-373112   | JH736687 | 371416  | 373112  | 4 | 1697 | Alligator sinensis immunoglobulin heavy chain region genomic sequence                                                                                     | 67%  | JQ479335.1     |
| JH736845:61657-63362     | JH736845 | 61657   | 63362   | 3 | 1706 | Crocodylus siamensis immunoglobulin heavy chain region genomic sequence                                                                                   | 73%  | JQ479336.1     |
| JH736964:546625-548106   | JH736964 | 546625  | 548106  | 3 | 1482 | Alligator sinensis immunoglobulin heavy chain region genomic sequence                                                                                     | 83%  | JQ479335.1     |
| JH736973:627286-628776   | JH736973 | 627286  | 628776  | 3 | 1491 | PREDICTED: Alligator sinensis wingless-type MMTV integration site family, member 11 (WNT11), transcript variant X3, mRNA                                  | 70%  | XM_006021962.1 |
| JH737063:168902-170373   | JH737063 | 168902  | 170373  | 3 | 1472 | Alligator mississippiensis isolate 1248all ultra conserved element locus chr3_457 genomic sequence                                                        | 100% | JQ870061.1     |
| JH737131:300064-301546   | JH737131 | 300064  | 301546  | 3 | 1483 | Crocodylus porosus clone CpP2708 microsatellite sequence                                                                                                  | 71%  | EU593461.1     |
| JH737153:110481-112628   | JH737153 | 110481  | 112628  | 3 | 2148 | Crocodylus porosus clone CpP111 microsatellite sequence                                                                                                   | 73%  | EU593326.1     |
| JH737179:197634-199113   | JH737179 | 197634  | 199113  | 3 | 1480 | Alligator sinensis immunoglobulin heavy chain region genomic sequence                                                                                     | 86%  | JQ479335.1     |
| JH737248:244181-245620   | JH737248 | 244181  | 245620  | 3 | 1440 | Crocodylus siamensis immunoglobulin heavy chain region genomic sequence                                                                                   | 79%  | JQ479336.1     |
| JH737283:143820-145280   | JH737283 | 143820  | 145280  | 3 | 1461 | PREDICTED: Alligator mississippiensis steroid-5-alpha-reductase, alpha polypeptide 1 (3-oxo-5 alpha-steroid delta 4-dehydrogenase alpha 1) (SRD5A1), mRNA | 75%  | XM_006271131.1 |
| JH737421:2006056-2007706 | JH737421 | 2006056 | 2007706 | 3 | 1651 | PREDICTED: Alligator sinensis zinc finger protein 436-like (LOC102371443), mRNA                                                                           | 72%  | XM_006037782.1 |
| JH737508:64670-66609     | JH737508 | 64670   | 66609   | 3 | 1940 | Alligator mississippiensis Chompy miniature inverted-repeat transposable element, partial sequence                                                        | 85%  | DQ063331.1     |
| JH737528:98254-1e+05     | JH737528 | 98254   | 100000  | 3 | 1747 | Crocodylus siamensis immunoglobulin heavy chain region genomic sequence                                                                                   | 87%  | JQ479336.1     |
| JH737615:26189-27617     | JH737615 | 26189   | 27617   | 3 | 1429 | PREDICTED: Alligator sinensis biogenesis of lysosomal organelles complex-1, subunit 6, pallidin (BLOC1S6), mRNA                                           | 75%  | XM_006030425.1 |
| JH737854:72398-73874     | JH737854 | 72398   | 73874   | 3 | 1477 | Alligator sinensis immunoglobulin heavy chain region genomic sequence                                                                                     | 86%  | JQ479335.1     |
| JH738122:78203-79686     | JH738122 | 78203   | 79686   | 3 | 1484 | Crocodylus porosus clone CpP307 microsatellite sequence                                                                                                   | 88%  | EU593353.1     |
| JH738431:43066-44963     | JH738431 | 43066   | 44963   | 3 | 1898 | Physcomitrella patens subsp. patens predicted protein (PHYPADRAFT_164024) mRNA, complete cds                                                              | 90%  | XM_001763795.1 |
| JH738442:167010-168445   | JH738442 | 167010  | 168445  | 3 | 1436 | Dracunculus medinensis genome assembly                                                                                                                    |      |                |
| JH738474:153750-155690   | JH738474 | 153750  | 155690  | 3 | 1941 | D_medinensis_Ghana, scaffold DME_scaffold0000018                                                                                                          | 89%  | LK978209.1     |
| JH738538:1532-2971       | JH738538 | 1532    | 2971    | 3 | 1440 | Alligator sinensis immunoglobulin heavy chain region genomic sequence                                                                                     | 71%  | JQ479335.1     |
| JH739113:40697-42142     | JH739113 | 40697   | 42142   | 3 | 1446 | Chrysemys picta BAC clone CHY3-54H12 from chromosome unknown, complete sequence                                                                           | 83%  | AC239516.2     |
| JH739330:19933-21357     | JH739330 | 19933   | 21357   | 3 | 1425 | PREDICTED: Alligator mississippiensis desumoylating isopeptidase 2-like (LOC102565785), mRNA                                                              | 100% | XM_006277696.1 |
| JH739416:273343-275342   | JH739416 | 273343  | 275342  | 3 | 2000 | Crocodylus siamensis immunoglobulin heavy chain region genomic sequence                                                                                   | 73%  | JQ479336.1     |
|                          |          |         |         |   |      | Mus musculus BAC clone RP24-34219 from chromosome 12, complete sequence                                                                                   | 74%  | AC159621.2     |

The MI vs. WO (3+ adjacent probe) DMR associated genes are presented with DMR name, chromosome (genomic contig) location, start and stop locations of the DMR, number of adjacent oligo (Adj. Oligo) in the DMR, size in base pair (bp) of the DMR, DMR associated gene description, percent (%) identity between the gene homology and DMR sequence and gene accession identification are presented for each DMR.
